# Supplementary material for: Precision excimer laser annealed Ga-doped ZnO electron transport layers for perovskite solar cells
Source: PubMed Central journal article supplement — RSC Adv. 2018 May 15;8(32):17694–701. doi: 10.1039/c8ra03119c (PMC9080559; doi:10.1039/c8ra03119c), 2018-05-15
Supplement: RA-008-C8RA03119C-s001.pdf [file RA-008-C8RA03119C-s001.pdf]

# Precision Excimer Laser Annealed Ga-doped ZnO Electron Transport Layer for Perovskite Solar Cells

Rui Xia,<sup>ab</sup> Guangyue Yin,<sup>ac</sup> Shimao Wang,<sup>ad</sup> Weiwei Dong,<sup>\*ad</sup> Libing You,<sup>a</sup> Gang Meng,<sup>ad</sup>  
Xiaodong Fang,<sup>\*acd</sup> Mohammad Khaja Nazeeruddin,<sup>b</sup> Zhaofu Fei,<sup>b</sup> Paul J. Dyson<sup>\*b</sup>

<sup>a</sup>Anhui Provincial Key Laboratory of Photonic Devices and Materials, Anhui Institute of Optics and Fine Mechanics, Chinese Academy of Sciences, Hefei 230031, China

<sup>b</sup>Institut des Sciences et Ingénierie Chimiques, Ecole Polytechnique Fédérale de Lausanne (EPFL), CH-1015 Lausanne, Switzerland.

<sup>c</sup> University of Science and Technology of China, Hefei 230026, China.

<sup>d</sup>Key laboratory of photovoltaic and energy conservation materials, Chinese Academy of Sciences, Hefei 230031, China

E-mail: [wwdong@aiofm.ac.cn](mailto:wwdong@aiofm.ac.cn) (W. Dong), [xdfang@aiofm.ac.cn](mailto:xdfang@aiofm.ac.cn) (X. Fang), [paul.dyson@epfl.ch](mailto:paul.dyson@epfl.ch)

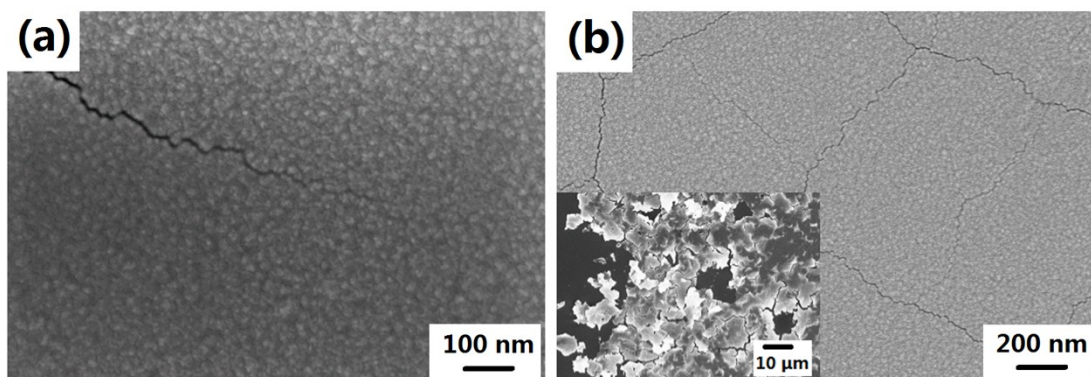

Fig S1 Surface SEM images of (a) ELA 90-30 and (b) ELA 105-1, the inset is ELA 105-20.

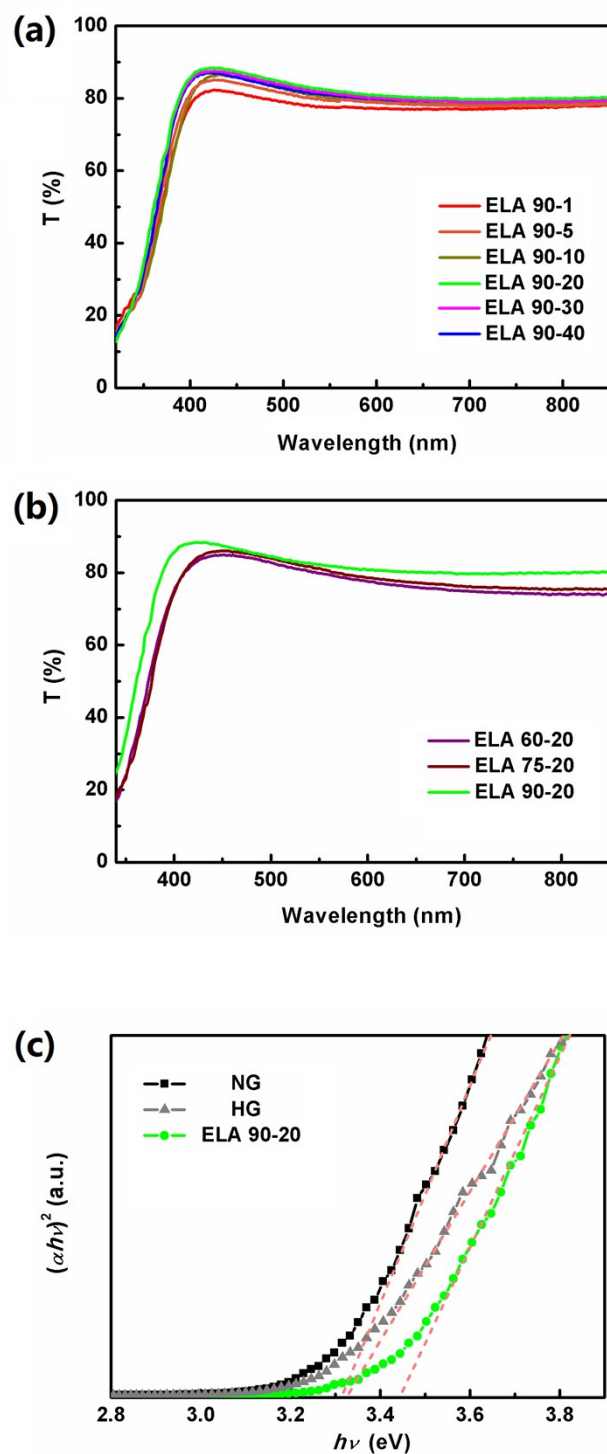

Fig S2 Transmittance spectra of GZO films with ELA treatment when (a) laser fluence is fixed at 90 mJ cm<sup>-2</sup> and (b) pulse counts are fixed at 20. (c)  $(\alpha h\nu)^2$  vs  $h\nu$  plots of the GZO films with different treatments.

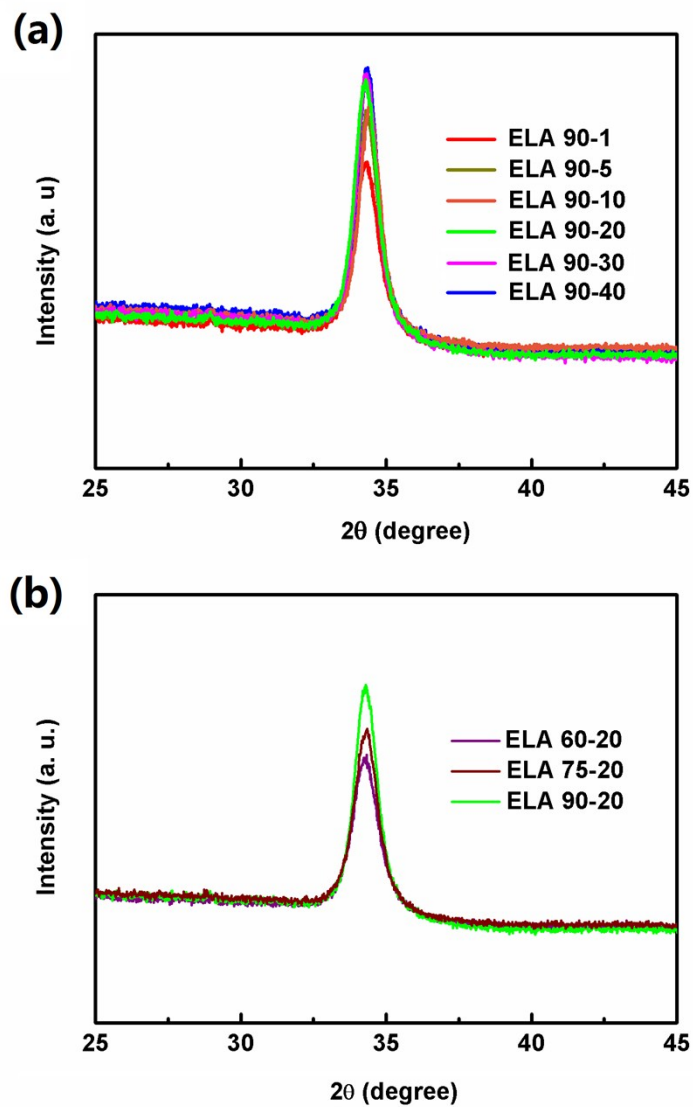

Fig S3 XRD patterns of GZO films with ELA treatment when (a) laser fluence is fixed at 90 mJ cm<sup>-2</sup> and (b) pulse counts are fixed at 20.

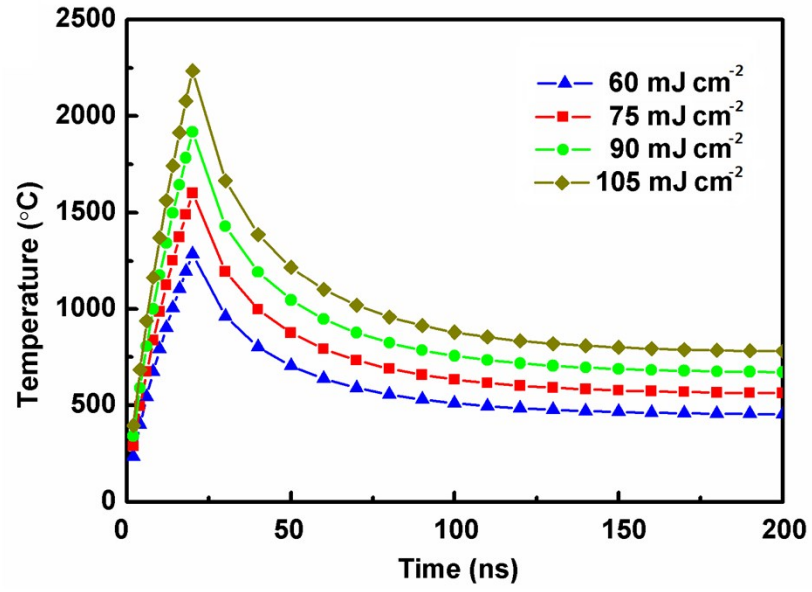

Fig. S4 Variation of the surface temperature with the time after loading 1 pulse with different fluence.

Table S1 Parameters used in ANSYS simulation process<sup>1-3</sup>. When  $t = 0$ ,  $t = T_0$  (27 °C), it is assumed that there is no heat loss on the surface of the films and the thickness of the sample is sufficient for the diffusion of heat inside<sup>4</sup>.

| Parameters                                                | GZO  | Glass |
|-----------------------------------------------------------|------|-------|
| Density (kg/m <sup>3</sup> )                              | 5675 | 2400  |
| Specific heat capacity J (kg K) <sup>-1</sup>             | 552  | 837   |
| Thermal conductivity (W m <sup>-1</sup> K <sup>-1</sup> ) | 23.4 | 1.1   |
| Melt point (°C)                                           | 1975 | 800   |

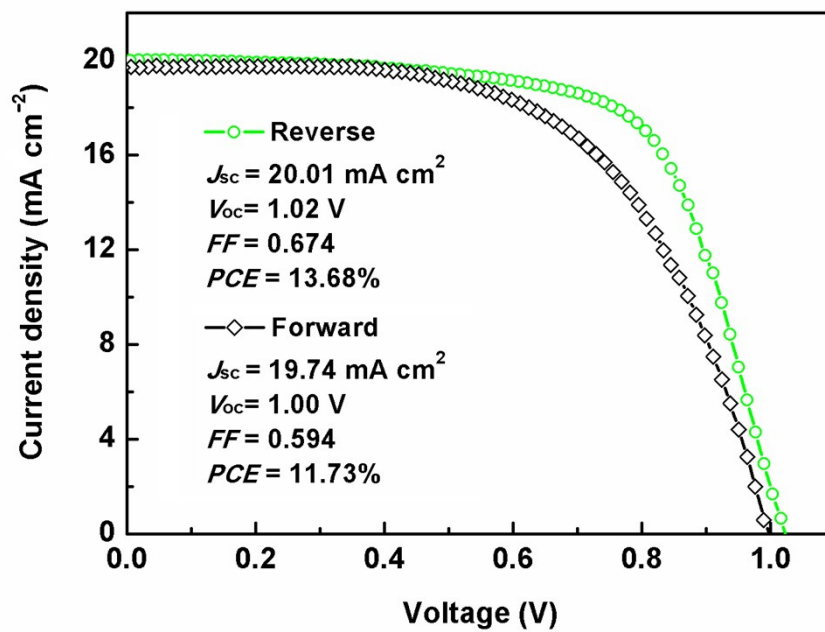

Fig. S5 Hysteresis analysis of the devices based on ELA 90-20 at a scan rate of  $50 \text{ mV s}^{-1}$

## Reference

- [1] D. R. Lide, CRC Handbook of Chemistry and Physics, 79th Ed; CRC Press, Boca Raton, FL, **1998**.
- [2] A. F. Wells, Structural Inorganic Chemistry, Clarendon Press: Oxford, **1990**.
- [3] W. W. Duley, UV Laser: effects and applications in materials science. Cambridge University Press, Cambridge, UK, **1996**, 100–101.
- [4] R. F. Wood, G. E. Giles, *Phys. Rev. B*, 1981, **23**, 2923.
